# Supplementary material
Source: PubMed Central journal article supplement (PMC7667639)
Supplement: jm0c01376_si_001.pdf [file jm0c01376_si_001.pdf]

# Supporting information

## **Optimized Opioid-Neurotensin Multitarget Peptides: From Design to Structure-Activity Relationship Studies**

*Simon Gonzalez<sup>1‡</sup>, Maria Dumitrascuta<sup>2‡</sup>, Emilie Eiselt<sup>3‡</sup>, Stevany Louis<sup>2</sup>, Linda Kunze<sup>2</sup>, Annalisa Blasio<sup>2</sup>, Mélanie Vivancos<sup>3</sup>, Santo Prevití<sup>1</sup>, Elke Dewolf<sup>1</sup>, Charlotte Martin<sup>1</sup>, Dirk Tourwé<sup>1</sup>, Florine Cavelier<sup>4</sup>, Louis Gendron<sup>3</sup>, Philippe Sarret<sup>3\*</sup>, Mariana Spetea<sup>2\*</sup>, Steven Ballet<sup>1\*</sup>*

<sup>1</sup> Research Group of Organic Chemistry, Departments of Chemistry and Bioengineering Sciences, Vrije Universiteit Brussel, 1050 Brussels, Belgium; <sup>2</sup> Department of Pharmaceutical Chemistry, Institute of Pharmacy and Center for Molecular Biosciences Innsbruck (CMBI), University of Innsbruck, 6020 Innsbruck, Austria; <sup>3</sup> Department of Pharmacology and Physiology, Faculty of Medicine and Health Sciences, Institut de Pharmacologie de Sherbrooke, Université de Sherbrooke, J1H 5N4 Sherbrooke, Canada; <sup>4</sup> Institut des Biomolécules Max Mousseron, UMR 5247, CNRS, Université de Montpellier, ENSCM, 34095 Montpellier, France.

‡ Equal contribution

\* Corresponding authors

### **Table of Contents**

|                                                        |    |
|--------------------------------------------------------|----|
| 1. Analytical characterization of the OP-NT hybrids    | S2 |
| 2. HPLC chromatograms of all synthesized OP-NT hybrids | S3 |
| 3. Competition binding curves                          | S7 |

## 1. Analytical characterization of the OP-NT hybrids

| Peptide number | Sequence                                                    | Yield             | Purity | HPLC rt (min) | Formula                                                          | HRMS [M+H] <sup>+</sup> (Da) |           |
|----------------|-------------------------------------------------------------|-------------------|--------|---------------|------------------------------------------------------------------|------------------------------|-----------|
|                |                                                             |                   |        |               |                                                                  | Calculated                   | Found     |
| 3              | <i>H-Dmt-DArg-Aba-βAla-Arg-Arg-Pro-Tyr-Tle-Leu-OH</i>       | 19% <sup>b</sup>  | > 97%  | 1.77          | C <sub>68</sub> H <sub>103</sub> N <sub>19</sub> O <sub>13</sub> | 1394.8055                    | 1394.8020 |
| 4              | <i>H-Dmt-DArg-Aba-βAla-Lys-Lys-Pro-Tyr-Tle-Leu-OH</i>       | 18% <sup>b</sup>  | > 97%  | 1.88          | C <sub>68</sub> H <sub>103</sub> N <sub>15</sub> O <sub>13</sub> | 1338.7932                    | 1338.7921 |
| 5              | <i>H-Dmt-DArg-Aba-βAla-Arg-Arg-Pro-Dmt-Tle-Leu-OH</i>       | 26% <sup>b</sup>  | > 97%  | 1.98          | C <sub>70</sub> H <sub>107</sub> N <sub>19</sub> O <sub>13</sub> | 1422.8368                    | 1422.8341 |
| 6              | <i>H-Dmt-DArg-Aba-βAla-Lys-Lys-Pro-Dmt-Tle-Leu-OH</i>       | 2.5% <sup>a</sup> | > 95%  | 1.78          | C <sub>70</sub> H <sub>107</sub> N <sub>15</sub> O <sub>13</sub> | 1366.8246                    | 1366.8253 |
| 7              | <i>H-Dmt-DArg-Aba-βAla-β3hArg-Arg-Pro-Dmt-Tle-Leu-OH</i>    | 21% <sup>b</sup>  | > 97%  | 1.97          | C <sub>71</sub> H <sub>109</sub> N <sub>19</sub> O <sub>13</sub> | 1436.8525                    | 1436.8553 |
| 8              | <i>H-Dmt-DArg-Aba-βAla-β3hLys-Lys-Pro-Dmt-Tle-Leu-OH</i>    | 13% <sup>b</sup>  | > 97%  | 1.95          | C <sub>71</sub> H <sub>109</sub> N <sub>15</sub> O <sub>13</sub> | 1380.8402                    | 1380.8401 |
| 9              | <i>H-Dmt-DArg-Aba-βAla-Arg-Arg-Pro-(6-OH)Tic-Tle-Leu-OH</i> | 31% <sup>b</sup>  | > 97%  | 1.78          | C <sub>69</sub> H <sub>103</sub> N <sub>19</sub> O <sub>13</sub> | 1406.8062                    | 1406.8007 |
| 10             | <i>H-Dmt-DArg-Aba-βAla-Lys-Lys-Pro-(6-OH)Tic-Tle-Leu-OH</i> | 3.5% <sup>a</sup> | > 95%  | 1.85          | C <sub>69</sub> H <sub>103</sub> N <sub>15</sub> O <sub>13</sub> | 1350.7932                    | 1350.7971 |
| 11             | <i>H-Dmt-DArg-Aba-βAla-Arg-Arg-Pro-mTyr-Tle-Leu-OH</i>      | 12% <sup>b</sup>  | > 97%  | 1.81          | C <sub>68</sub> H <sub>103</sub> N <sub>19</sub> O <sub>13</sub> | 1394.8062                    | 1394.8090 |

|             |                                                        |                  |       |                   |                                                                  |               |           |
|-------------|--------------------------------------------------------|------------------|-------|-------------------|------------------------------------------------------------------|---------------|-----------|
| <b>12</b>   | <i>H-Dmt-DArg-Aba-βAla-Lys-Lys-Pro-mTyr-Tle-Leu-OH</i> | 15% <sup>b</sup> | > 97% | 1.89              | C <sub>68</sub> H <sub>103</sub> N <sub>15</sub> O <sub>13</sub> | 1338.793<br>2 | 1338.7910 |
| <b>PK20</b> | <i>H-Dmt-DLys-Phe-Phe-Lys-Lys-Pro-Phe-Tle-Leu-OH</i>   | 46% <sup>b</sup> | > 97% | 3.01 <sup>c</sup> | C <sub>73</sub> H <sub>107</sub> N <sub>13</sub> O <sub>12</sub> | 1358.823<br>5 | 1358.8241 |

<sup>a</sup>Synthesized via Method A (see experimental section) using Fmoc-Leu Wang resin (0.827 mmol/g, 121 mg).

<sup>b</sup>Synthesized via Method B (see experimental section) using preloaded Fmoc-Leu Wang TG resin (0.25 mmol/g, 400 mg).

HPLC analyses were performed with a Chromolith HR C18 50x4.6 column using a gradient from 1% AcN + 0.1% TFA to 99% in mQ water + 0.1% TFA.

<sup>c</sup>HPLC analysis performed with a Chromolith HR C18 150x4.6 column using a gradient from 1% AcN + 0.1% TFA to 99% in mQ water + 0.1% TFA.

## 2. HPLC chromatograms of all synthesized OP-NT hybrids

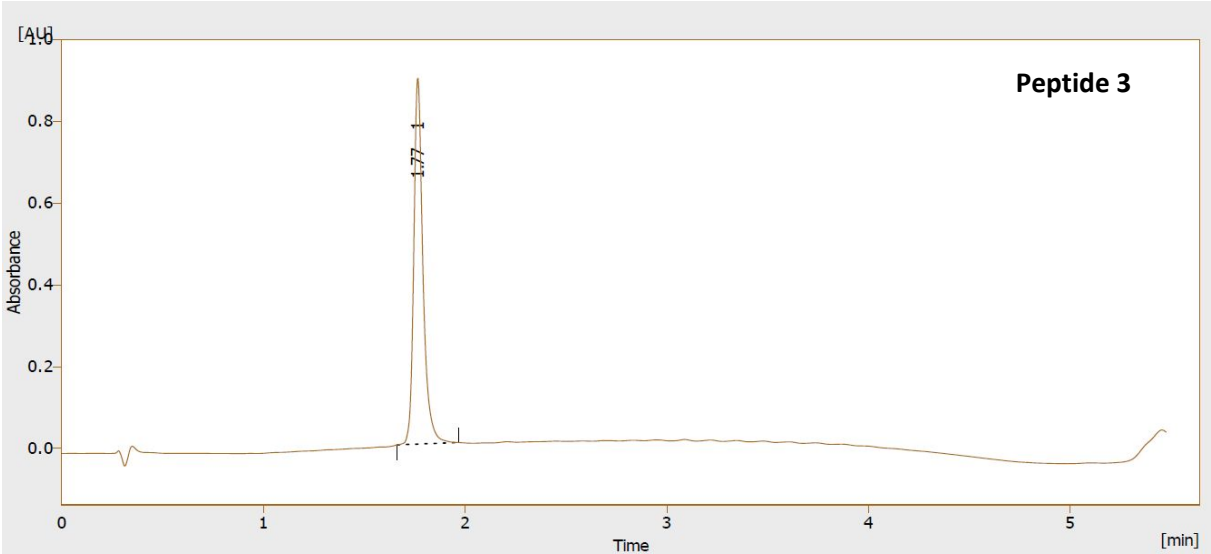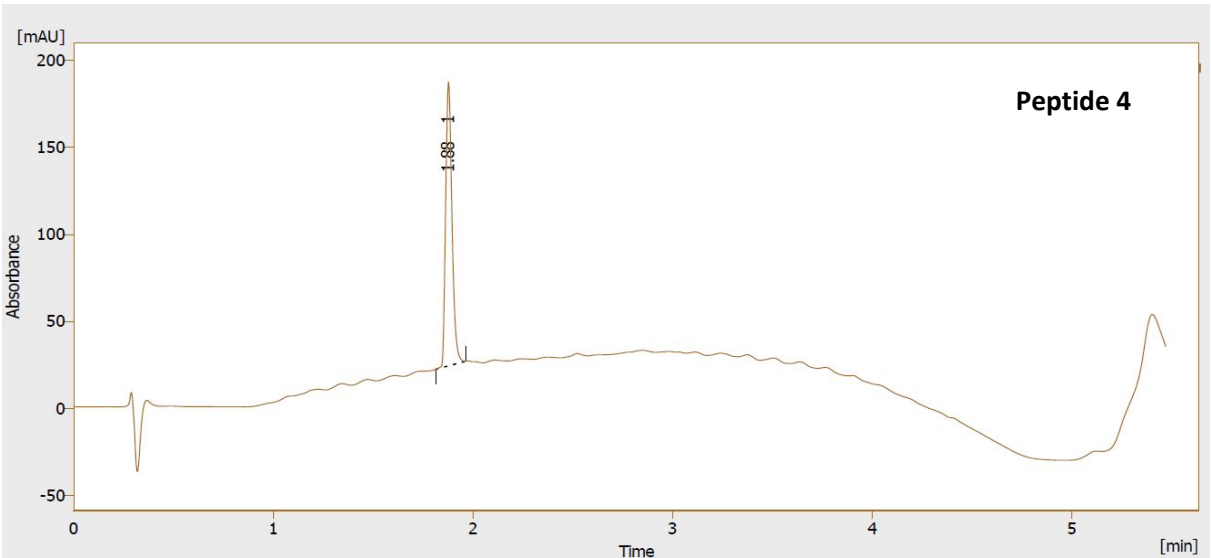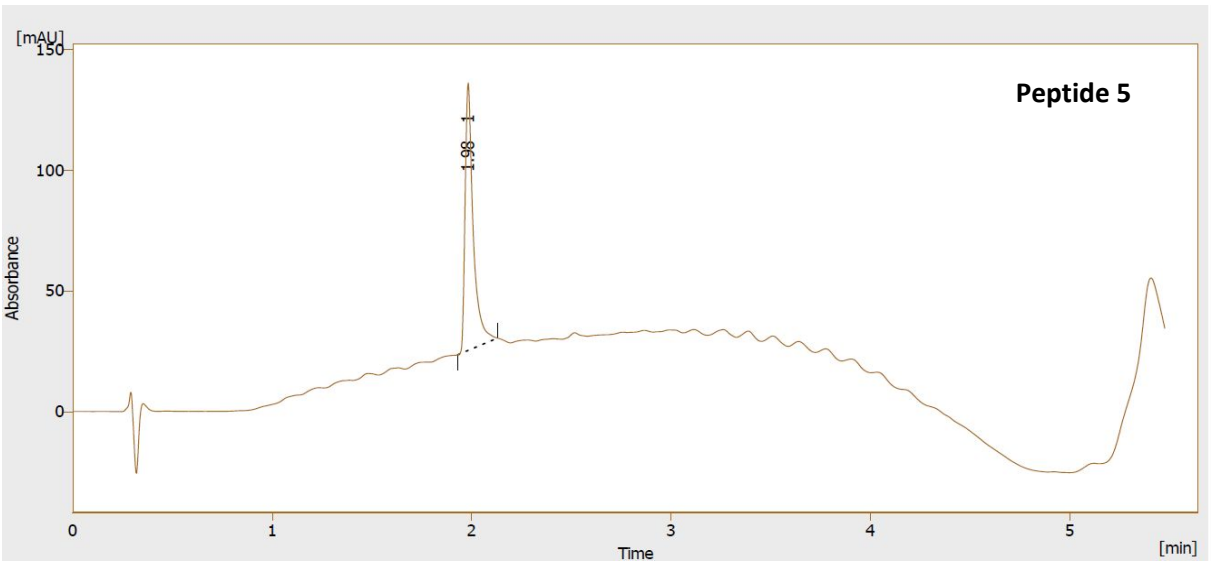

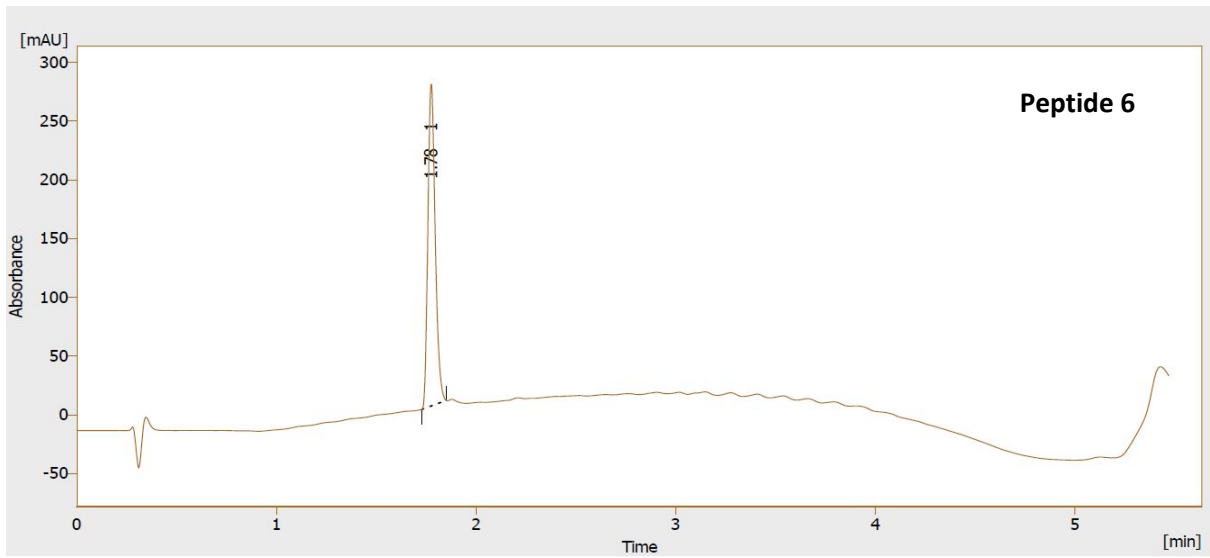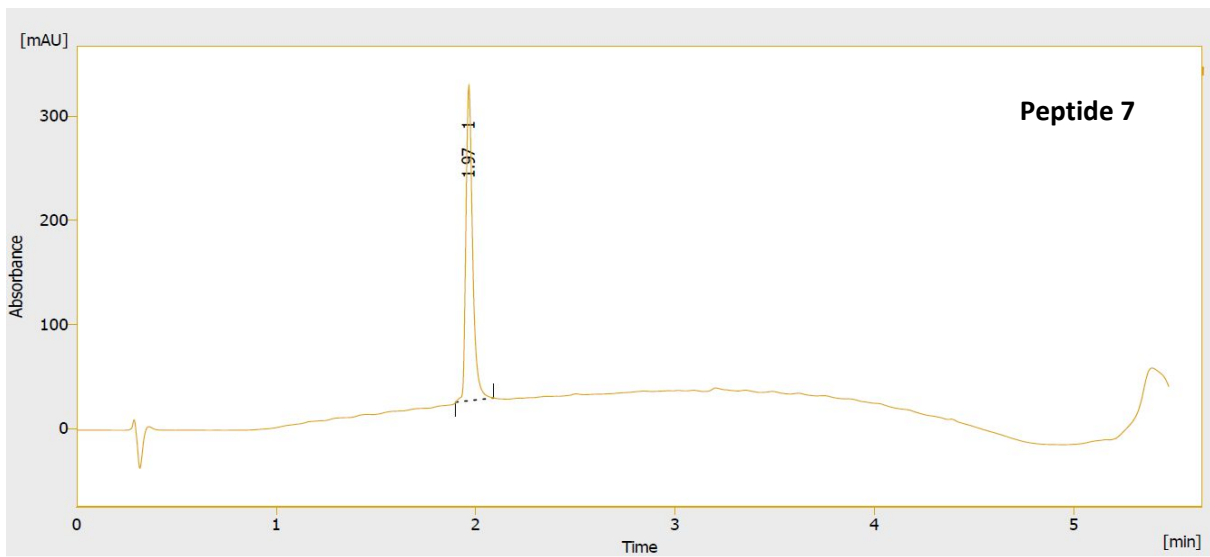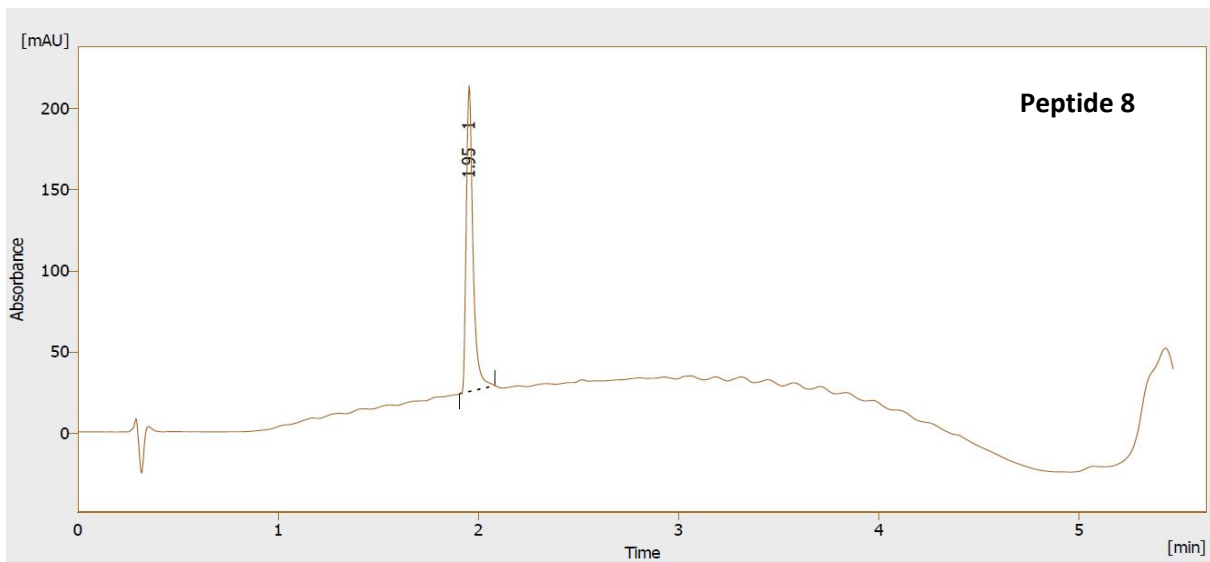

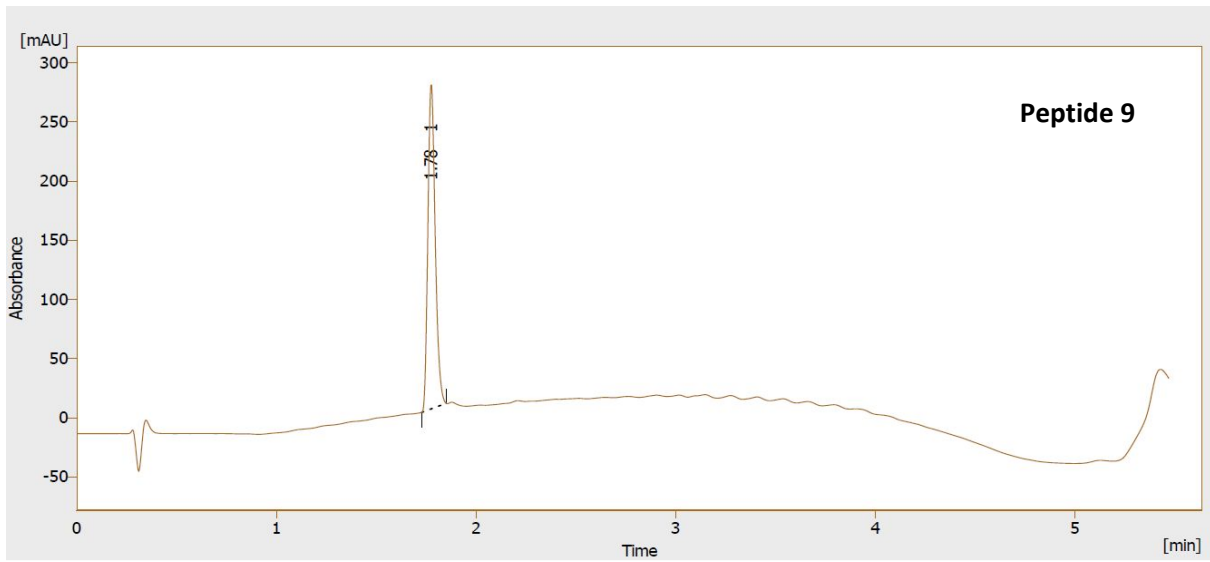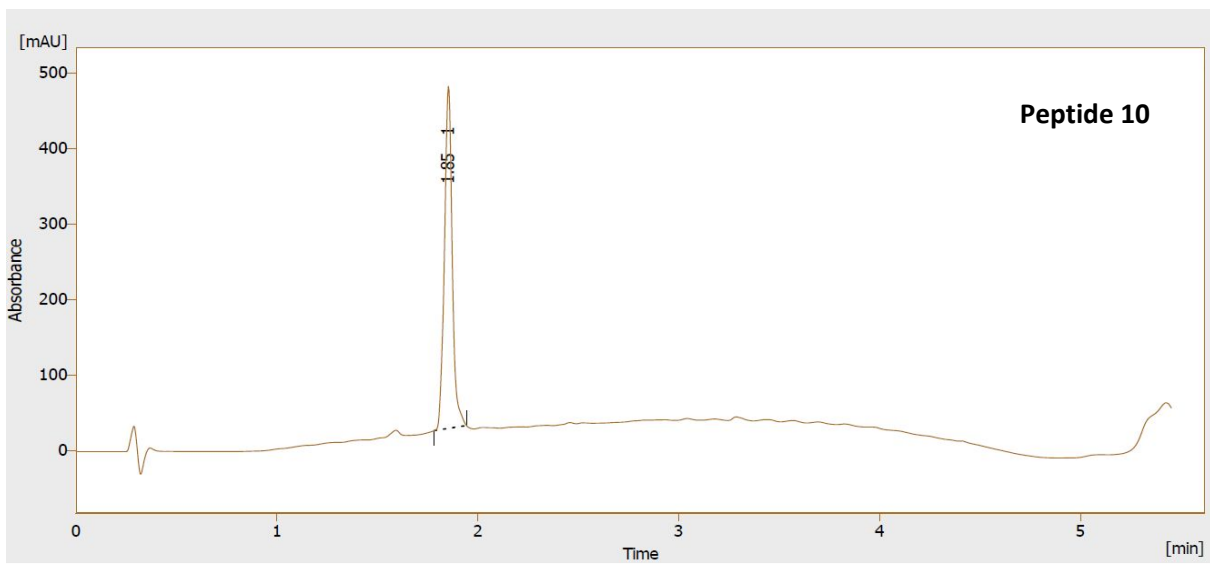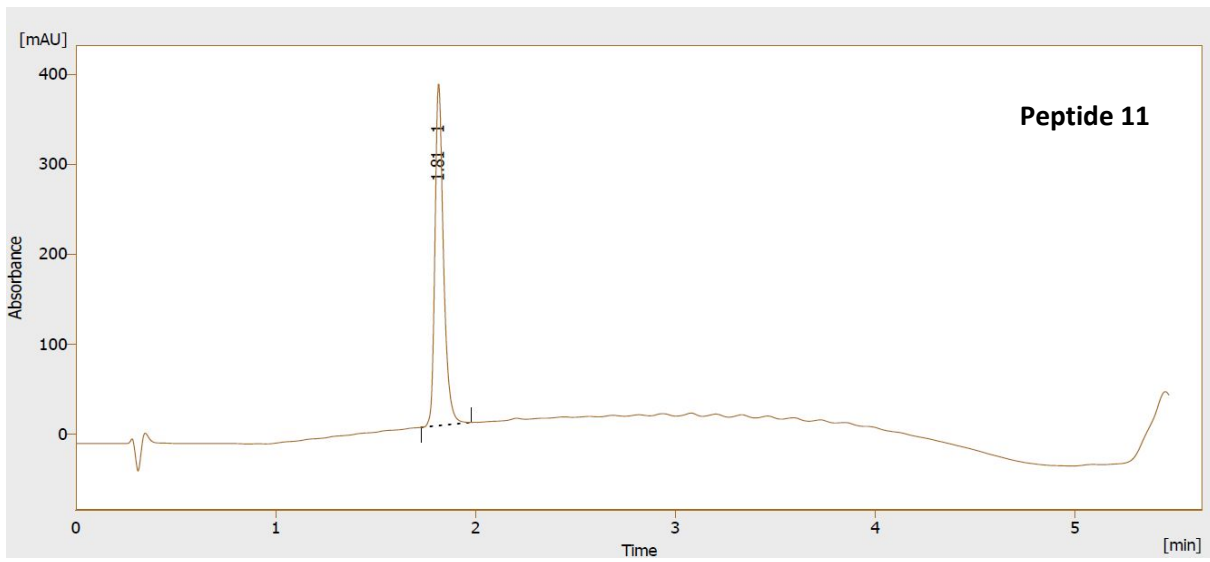

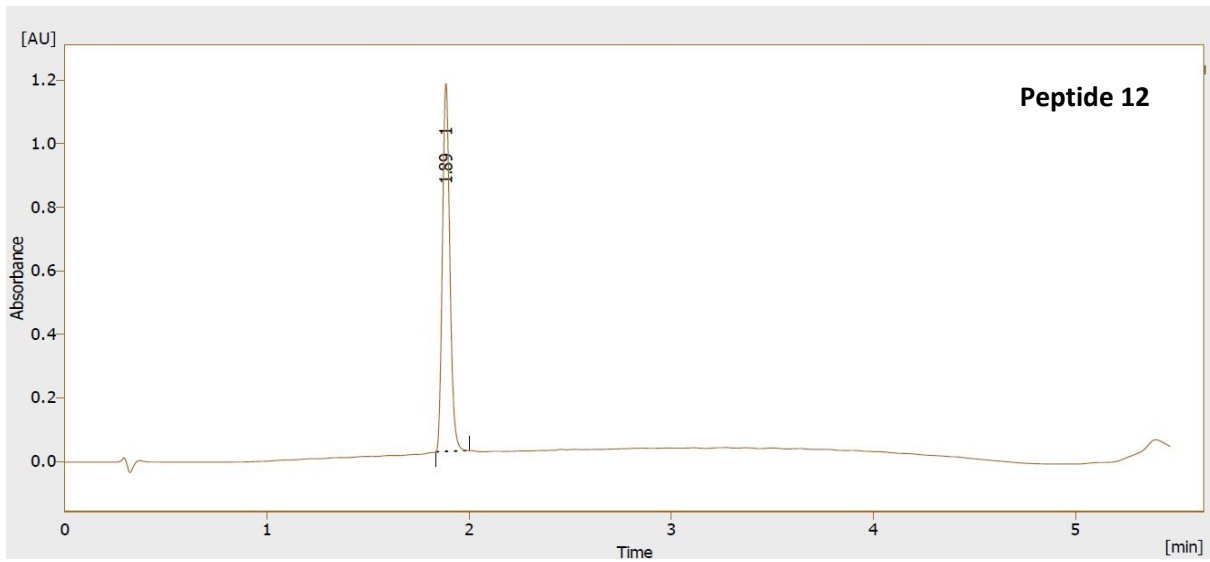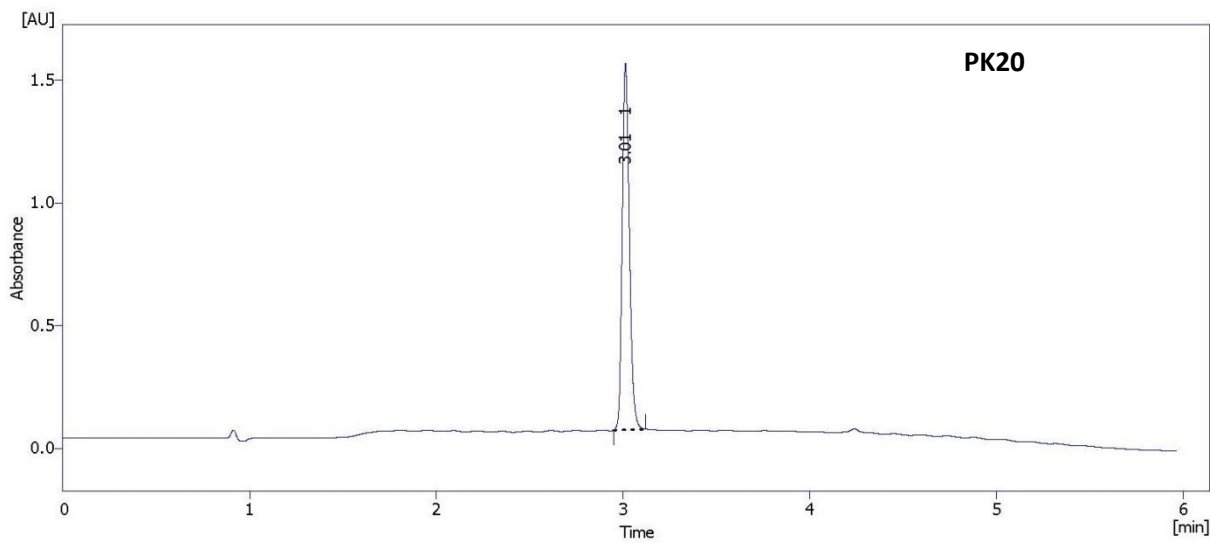



### 3. Competition binding curves

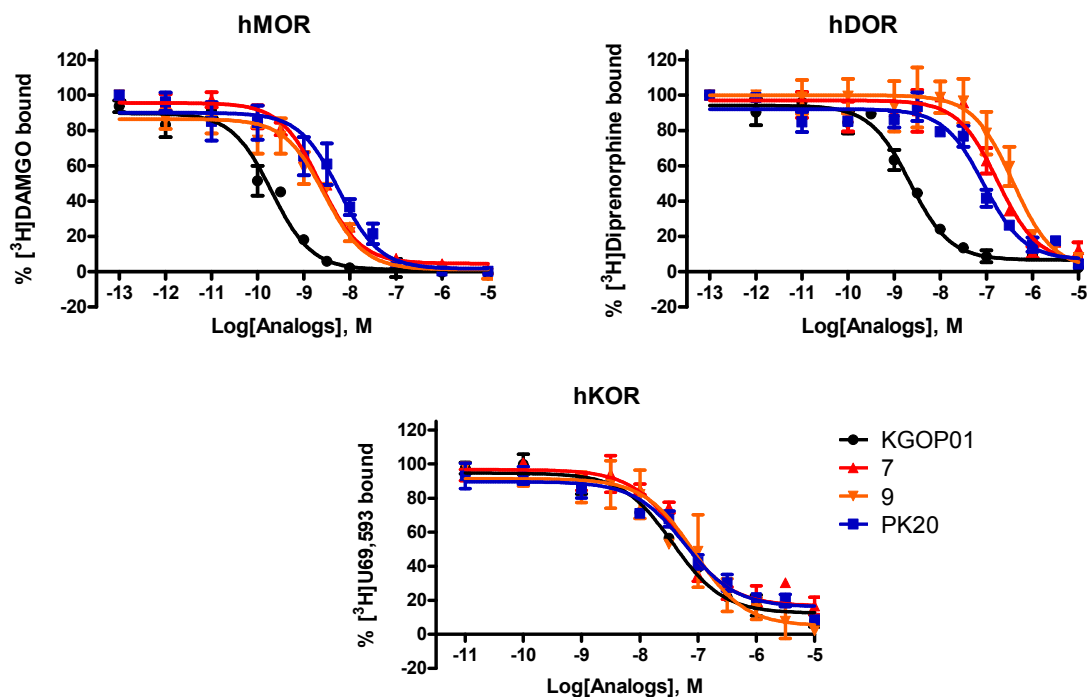

**Figure S1.** Competition binding curves of **KGOP01**, **PK20** and OP-NT hybrid peptides **7** and **9** to human opioid receptors. Concentration-dependent inhibition by test compounds of [<sup>3</sup>H]DAMGO (MOR), [<sup>3</sup>H]diprenorphine (DOR) and [<sup>3</sup>H]U69,593 (KOR) binding to membranes from CHO cells stably expressing hMOR, hDOR or hKOR, determined in radioligand binding assays. Data are means  $\pm$  SEM of three independent experiments performed in duplicate.

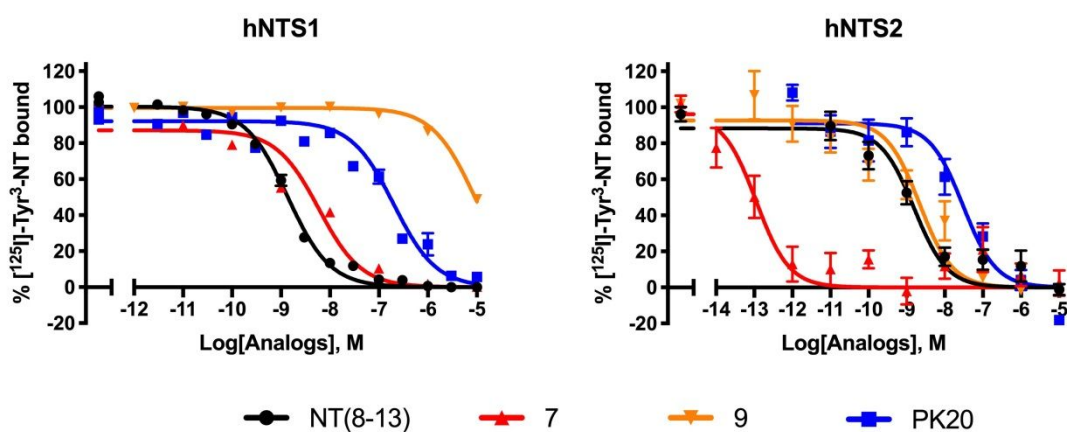

**Figure S2.** Competition binding curves of **NT(8-13)**, **PK20** and OP-NT hybrid peptides **7** and **9** to human neurotensin receptors. Concentration-dependent inhibition by test compounds of [<sup>125</sup>I]-NT binding to membranes from CHO cells stably expressing hNTS1 or membranes from 1321N1 cells stably expressing the hNTS2, determined in radioligand binding assays. Data are means  $\pm$  SEM of three independent experiments performed in triplicate.
